# Supplementary material
Source: Springer Nature journal article supplement (https://www.springermedizin.de/resource/supplementary/12885_2011_2797_MOESM2_ESM.pdf/9462008)

### Males

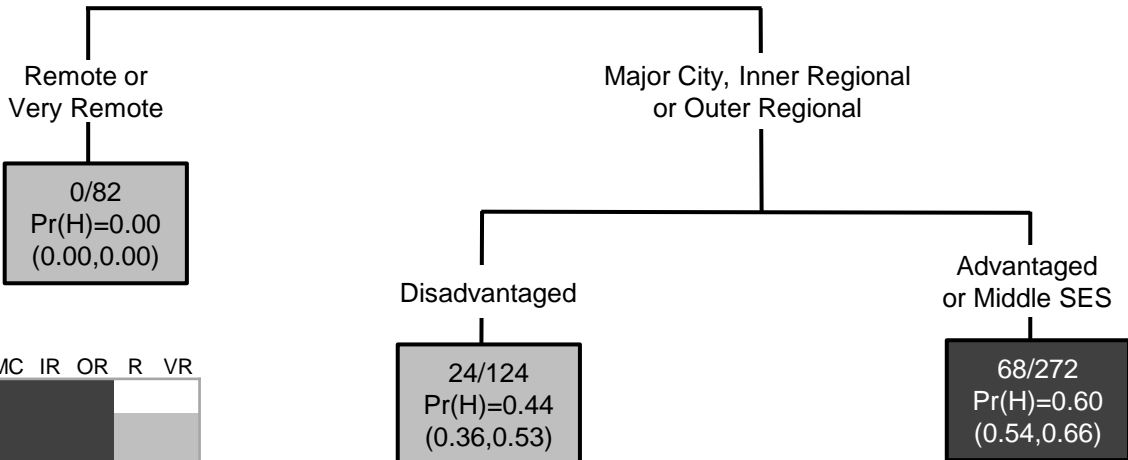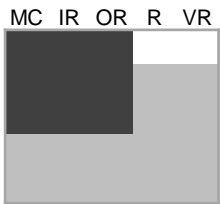

### Females

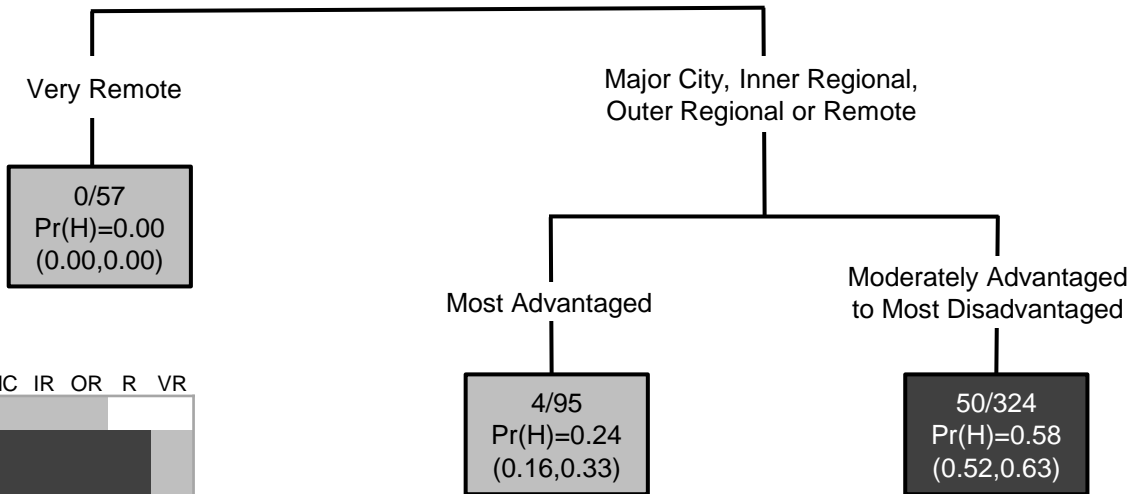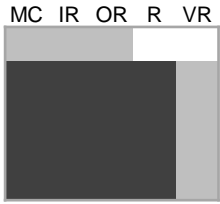

Supplement: MOESM2 [file 9462008]
